# Supplementary material
Source: ML conference proceedings conference paper supplement (https://openaccess.thecvf.com/content/CVPR_2020/html/Mi_SSRNet_Scalable_3D_CVPR_2020_paper.html)
Supplement: Supplementary file 1 [file ssrnet_pdf.pdf › ssrnet_pdf.pdf]

# SSRNet: Scalable 3D Surface Reconstruction Network

Zhenxing Mi <sup>†</sup>

Yiming Luo <sup>†</sup>

Wenbing Tao <sup>\*</sup>

National Key Laboratory of Science and Technology on Multi-spectral Information Processing  
School of Artificial Intelligence and Automation, Huazhong University of Science and Technology, China

{m201772503, yiming\_luo, wenbingtao}@hust.edu.cn

## 1. Data Preparation

Our SSRNet is trained in a supervised fashion. The input training data include points and labeled vertices from the finest-level of an octree. We propose a method to label octree vertices with respect to a ground-truth surface. This method takes a point cloud and a ground-truth surface with surface normals as input. It first normalizes the coordinates of the points and surfaces according to the bounding box. Then an octree is built from the point cloud. The octree building method is adapted from the open-source code of Poisson Surface Reconstruction (PSR) [1]. It makes sure that the finest level of the result octree contains not only cubes with points in them, but also their  $3 \times 3 \times 3$  neighbor cubes. Therefore, the octree is dense enough to completely contain the implicit surface. In the meantime, the vertices of the finest-level octree cubes are guaranteed to be close to the surface, which makes front-back labeling feasible.

In order to label finest-level octree vertices, we compute the intersections of octree edges and surface triangles. Since octree edges are all aligned with axes, we adapt an efficient method in [3]. Figure 1 shows a 2D example of our method for the sake of simplicity. The method consists of three steps.

**Step 1:** We first find the intersections of surface triangles and the grid lines of the octree. It is accomplished by projecting each triangle in the input surface to the  $XY, YZ, ZX$  planes. Since we propose an example in 2D, in Figure 1, the segment  $t$  represents a triangle in 3D space and the axis  $ox$  represents a coordinate plane in 3D space. As the Figure 1 (a) shows, after projection, we are able to detect that the two grid lines  $l_1$  and  $l_2$  intersect  $t$ .

**Step 2:** After detecting the intersections of grid lines and triangles, we are able to determine whether an octree edge intersects a triangles because each octree edge lies on a grid line. As the Figure 1 (b) shows, the two edges  $e_1$  and  $e_2$  intersects a triangle  $t$ . we label the two vertices of an intersected edge according to the triangle normal direction  $\mathbf{n}_t$ .

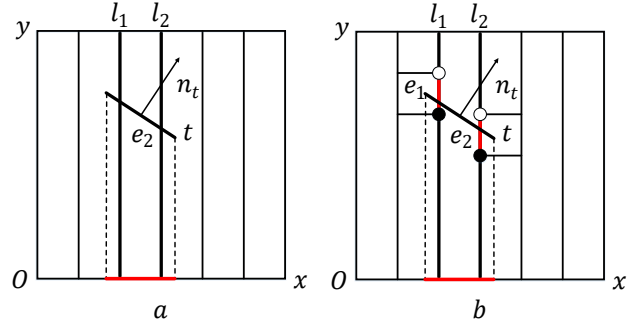

Figure 1. Example of our method for training data generation. (a) and (b) are 2D examples.

Let  $\mathbf{n}_v$  be the vector from the intersection to the vertex  $v$ . In our front-back definition, if the angle between  $\mathbf{n}_v$  and  $\mathbf{n}_t$  is larger than  $90^\circ$ , the vertex  $v$  is labeled as at back of the surface. Otherwise, it is labeled as in front of the surface. That is,

$$label_v = \begin{cases} 0 & \text{if } \mathbf{n}_v^\top \mathbf{n}_t \leq 0 \\ 1 & \text{if } \mathbf{n}_v^\top \mathbf{n}_t > 0 \end{cases} \quad (1)$$

In our computation, one edge may have multiple intersections with the surface and one vertex may belong to edges of different directions. Therefore, conflicts may occur on the label of one vertex. However, these situations rarely happen at a high resolution octree in practice. If these happen, we just choose one of the multiple labels.

**Step 3:** After Step 2, part of vertices near the surface are labeled. These vertices divide the region into two parts and serves as a decision boundary of front and back. In order to label other vertices, we just search their nearest neighbors in the labeled vertices. Then we give them the same label as the neighbors.

Our method for training data generation introduced above is for general purpose. In practice, we are lack of public available ground-truth surfaces for large-scale

<sup>†</sup>Equal contribution

<sup>\*</sup>Corresponding author

datasets, so we use surfaces reconstructed by PSR to generate training data. If we have ground truth surfaces for large-scale datasets in the future, we can get more accurate training data directly from these surfaces using our training data generation method.

## 2. Surfaces on ShapeNet

We report more figures of the result surfaces reconstructed by our method on ShapeNet at octree depth 8. Figure 2, 3, 4, 5, 6, 7, 8 shows the reconstructed surfaces of our SSRNet and ONet [2].

## 3. Surfaces on DTU Testing Scans

We report more figures of the result surfaces reconstructed by our method on testing scans in DTU dataset at octree depth 9. Table 1, 2, 3, 4, 5, 6 show the detailed evaluation time. Figure 9, 10, 11, 12, 13, 14, 15 show the reconstructed surfaces of our SSRNet and PSR [1]. Surfaces reconstructed by PSR for comparison are reconstructed at octree depth 9 and trimmed at value 8 and 9.5.

## References

- [1] Michael Kazhdan and Hugues Hoppe. Screened poisson surface reconstruction. *ACM Transactions on Graphics (ToG)*, 32(3):29, 2013. 1, 2
- [2] Lars Mescheder, Michael Oechsle, Michael Niemeyer, Sebastian Nowozin, and Andreas Geiger. Occupancy networks: Learning 3d reconstruction in function space. In *Proceedings of the IEEE Conference on Computer Vision and Pattern Recognition*, pages 4460–4470, 2019. 2
- [3] Claudio Rocchini, Paolo Cignoni, Fabio Ganovelli, Claudio Montani, Paolo Pingi, and Roberto Scopigno. Marching intersections: an efficient resampling algorithm for surface management. In *Proceedings International Conference on Shape Modeling and Applications*, pages 296–305. IEEE, 2001. 1

Table 1. The time performance of our method. We report the first scale point number, first scale octree vertex number and triangle number in our results using million (M) as unit. The preprocessing time (Prep. time) includes octree construction time, downsampling time, tangent images precomputing time and batches computing time. The prediction time (Pred. time) is the time to load partitioned points and vertices and to predict labels of vertices using network.

| Number         | stl001  | stl002  | stl003  | stl004  | stl005  | stl006  | stl007  | stl008  |
|----------------|---------|---------|---------|---------|---------|---------|---------|---------|
| Point /M       | 2.40    | 2.04    | 2.81    | 1.81    | 2.81    | 2.02    | 1.74    | 2.07    |
| Vertex /M      | 0.958   | 0.753   | 1.64    | 0.883   | 1.24    | 0.829   | 0.855   | 0.978   |
| Triangle /M    | 0.365   | 0.292   | 0.634   | 0.367   | 0.509   | 0.340   | 0.337   | 0.372   |
| Batch          | 109     | 72      | 129     | 101     | 145     | 115     | 72      | 71      |
| Time/s         | stl001  | stl002  | stl003  | stl004  | stl005  | stl006  | stl007  | stl008  |
| Prep           | 25.466  | 20.491  | 34.875  | 20.555  | 33.021  | 22.844  | 19.361  | 22.201  |
| Pred(1 GPU)    | 111.615 | 80.36   | 161.186 | 108.138 | 157.469 | 117.156 | 81.564  | 80.853  |
| Pred(4 GPUs)   | 50.489  | 39.447  | 69.143  | 48.186  | 70.755  | 45.106  | 38.433  | 43.475  |
| Total (1 GPU)  | 137.776 | 101.535 | 196.758 | 129.369 | 191.205 | 140.641 | 101.535 | 103.713 |
| Total (4 GPUs) | 76.650  | 60.622  | 104.715 | 69.417  | 104.491 | 68.591  | 58.404  | 66.335  |

Table 2. The time performance of our method. We report the first scale point number, first scale octree vertex number and triangle number in our results using million (M) as unit. The preprocessing time (Prep. time) includes octree construction time, downsampling time, tangent images precomputing time and batches computing time. The prediction time (Pred. time) is the time to load partitioned points and vertices and to predict labels of vertices using network.

| Number         | stl009  | stl010  | stl011  | stl012 | stl013  | stl014  | stl015  | stl016  |
|----------------|---------|---------|---------|--------|---------|---------|---------|---------|
| Point /M       | 2.35    | 2.04    | 2.22    | 1.29   | 2.61    | 2.94    | 2.55    | 3.02    |
| Vertex /M      | 1.02    | 0.947   | 0.998   | 0.911  | 1.10    | 1.28    | 1.06    | 1.79    |
| Triangle /M    | 0.444   | 0.368   | 0.440   | 0.361  | 0.431   | 0.564   | 0.469   | 0.775   |
| Batch          | 97      | 82      | 94      | 39     | 86      | 144     | 132     | 96      |
| Time/s         | stl009  | stl010  | stl011  | stl012 | stl013  | stl014  | stl015  | stl016  |
| Prep           | 25.383  | 22.277  | 24.248  | 15.071 | 27.347  | 33.52   | 28.401  | 35.984  |
| Pred(1 GPU)    | 113.115 | 90.115  | 114.557 | 51.906 | 101.602 | 164.933 | 141.376 | 131.807 |
| Pred(4 GPUs)   | 52.864  | 43.256  | 63.047  | 28.020 | 49.640  | 69.795  | 60.871  | 57.434  |
| Total (1 GPU)  | 139.253 | 113.163 | 139.432 | 67.675 | 129.59  | 199.169 | 170.491 | 168.566 |
| Total (4 GPUs) | 79.002  | 66.304  | 87.922  | 43.789 | 77.628  | 104.031 | 89.986  | 94.193  |

Table 3. The time performance of our method. We report the first scale point number, first scale octree vertex number and triangle number in our results using million (M) as unit. The preprocessing time (Prep. time) includes octree construction time, downsampling time, tangent images precomputing time and batches computing time. The prediction time (Pred. time) is the time to load partitioned points and vertices and to predict labels of vertices using network.

| Number         | stl018  | stl019  | stl020  | stl021  | stl024  | stl029  | stl035  | stl038  |
|----------------|---------|---------|---------|---------|---------|---------|---------|---------|
| Point /M       | 2.25    | 2.51    | 2.05    | 2.67    | 2.45    | 2.88    | 2.23    | 1.89    |
| Vertex /M      | 1.08    | 1.17    | 0.993   | 1.31    | 0.877   | 1.14    | 0.901   | 0.787   |
| Triangle /M    | 0.478   | 0.496   | 0.421   | 0.608   | 0.353   | 0.477   | 0.356   | 0.320   |
| Batch          | 81      | 104     | 93      | 122     | 129     | 137     | 99      | 80      |
| Time/s         | stl018  | stl019  | stl020  | stl021  | stl024  | stl029  | stl035  | stl038  |
| Prep           | 24.767  | 28.693  | 22.966  | 30.732  | 26.443  | 31.451  | 24.234  | 20.607  |
| Pred(1 GPU)    | 95.375  | 117.374 | 98.553  | 134.578 | 134.27  | 143.643 | 24.234  | 20.607  |
| Pred(4 GPUs)   | 46.279  | 54.376  | 46.524  | 63.499  | 59.591  | 63.400  | 45.740  | 39.425  |
| Total (1 GPU)  | 120.839 | 146.781 | 122.175 | 166.026 | 161.356 | 175.89  | 133.429 | 102.232 |
| Total (4 GPUs) | 71.743  | 83.783  | 70.146  | 94.947  | 86.677  | 95.647  | 70.671  | 60.765  |

Table 4. The time performance of our method. We report the first scale point number, first scale octree vertex number and triangle number in our results using million (M) as unit. The preprocessing time (Prep. time) includes octree construction time, downsampling time, tangent images precomputing time and batches computing time. The prediction time (Pred. time) is the time to load partitioned points and vertices and to predict labels of vertices using network.

| Number         | stl041 | stl042 | stl045  | stl046  | stl048 | stl051 | stl055  | stl059  |
|----------------|--------|--------|---------|---------|--------|--------|---------|---------|
| Point /M       | 1.70   | 1.97   | 1.81    | 2.17    | 1.88   | 1.75   | 2.72    | 2.11    |
| Vertex /M      | 0.732  | 0.940  | 0.710   | 0.749   | 0.927  | 0.806  | 1.54    | 0.813   |
| Triangle /M    | 0.287  | 0.374  | 0.293   | 0.322   | 0.368  | 0.314  | 0.612   | 0.328   |
| Batch          | 57     | 65     | 75      | 105     | 58     | 58     | 93      | 72      |
| Time/s         | stl041 | stl042 | stl045  | stl046  | stl048 | stl051 | stl055  | stl059  |
| Prep           | 17.328 | 21.279 | 19.268  | 22.523  | 19.89  | 18.781 | 31.513  | 21.433  |
| Pred(1 GPU)    | 17.328 | 21.279 | 19.268  | 22.523  | 19.890 | 18.781 | 31.513  | 21.433  |
| Pred(4 GPUs)   | 32.284 | 40.075 | 38.097  | 51.272  | 33.651 | 33.520 | 56.488  | 40.812  |
| Total (1 GPU)  | 78.452 | 96.718 | 102.634 | 136.631 | 91.202 | 89.168 | 149.613 | 109.549 |
| Total (4 GPUs) | 50.233 | 62.052 | 58.124  | 74.417  | 54.209 | 52.979 | 88.667  | 62.978  |

Table 5. The time performance of our method. We report the first scale point number, first scale octree vertex number and triangle number in our results using million (M) as unit. The preprocessing time (Prep. time) includes octree construction time, downsampling time, tangent images precomputing time and batches computing time. The prediction time (Pred. time) is the time to load partitioned points and vertices and to predict labels of vertices using network.

| Number         | stl060  | stl061  | stl063 | stl065  | stl069  | stl084  | stl093  | stl094  |
|----------------|---------|---------|--------|---------|---------|---------|---------|---------|
| Point /M       | 2.63    | 1.96    | 2.13   | 2.86    | 2.67    | 2.30    | 2.79    | 2.55    |
| Vertex /M      | 1.13    | 0.794   | 0.886  | 1.67    | 1.41    | 1.06    | 1.14    | 1.02    |
| Triangle /M    | 0.463   | 0.328   | 0.349  | 0.704   | 0.556   | 0.435   | 0.450   | 0.402   |
| Batch          | 85      | 95      | 59     | 82      | 119     | 94      | 97      | 110     |
| Time/s         | stl060  | stl061  | stl063 | stl065  | stl069  | stl084  | stl093  | stl094  |
| Prep           | 27.597  | 21.052  | 21.553 | 33.728  | 31.514  | 25.254  | 29.804  | 26.563  |
| Pred(1 GPU)    | 100.657 | 99.334  | 76.773 | 111.888 | 131.461 | 112.381 | 111.470 | 120.886 |
| Pred(4 GPUs)   | 47.912  | 47.116  | 45.776 | 52.662  | 66.661  | 51.706  | 52.863  | 55.888  |
| Total (1 GPU)  | 128.887 | 121.125 | 99.081 | 146.356 | 163.741 | 138.407 | 141.946 | 148.248 |
| Total (4 GPUs) | 76.142  | 68.907  | 68.084 | 87.130  | 98.941  | 77.732  | 83.339  | 83.250  |

Table 6. The time performance of our method. We report the first scale point number, first scale octree vertex number and triangle number in our results using million (M) as unit. The preprocessing time (Prep. time) includes octree construction time, downsampling time, tangent images precomputing time and batches computing time. The prediction time (Pred. time) is the time to load partitioned points and vertices and to predict labels of vertices using network.

| Number         | stl095  | stl097  | stl106  | stl110  | stl114  | stl122  | stl126  | stl127  |
|----------------|---------|---------|---------|---------|---------|---------|---------|---------|
| Point /M       | 2.75    | 2.60    | 3.34    | 2.12    | 2.96    | 2.60    | 4.05    | 4.21    |
| Vertex /M      | 1.30    | 1.04    | 1.92    | 1.30    | 1.55    | 1.70    | 2.13    | 1.54    |
| Triangle /M    | 0.517   | 0.424   | 0.775   | 0.513   | 0.588   | 0.702   | 0.836   | 0.601   |
| Batch          | 98      | 92      | 116     | 69      | 135     | 114     | 118     | 133     |
| Time/s         | stl095  | stl097  | stl106  | stl110  | stl114  | stl122  | stl126  | stl127  |
| Prep           | 30.263  | 27.236  | 38.975  | 25.435  | 35.499  | 32.512  | 47.193  | 42.994  |
| Pred(1 GPU)    | 122.669 | 109.600 | 145.663 | 91.904  | 168.743 | 147.693 | 169.057 | 168.511 |
| Pred(4 GPUs)   | 53.797  | 52.231  | 68.101  | 58.003  | 67.392  | 61.119  | 85.317  | 75.161  |
| Total (1 GPU)  | 153.57  | 137.594 | 185.458 | 117.974 | 205.004 | 180.949 | 217.141 | 212.206 |
| Total (4 GPUs) | 84.698  | 80.225  | 107.896 | 84.073  | 103.653 | 94.375  | 133.401 | 118.856 |



| Ground Truth Model                                                                  | ONet                                                                                | Ours                                                                                  |
|-------------------------------------------------------------------------------------|-------------------------------------------------------------------------------------|---------------------------------------------------------------------------------------|
| Airplane                                                                            |                                                                                     |                                                                                       |
| 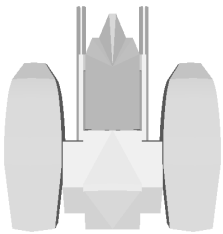   |    |    |
|    |    |    |
|   |   |   |
| Bench                                                                               |                                                                                     |                                                                                       |
|  |  |  |
|  |  |  |
|  |  |  |

Figure 2. Reconstructed surfaces of our network and ONet on ShapeNet testing set.

| Ground Truth Model                                                                  | ONet                                                                                | Ours                                                                                  |
|-------------------------------------------------------------------------------------|-------------------------------------------------------------------------------------|---------------------------------------------------------------------------------------|
| Rifle                                                                               |                                                                                     |                                                                                       |
| 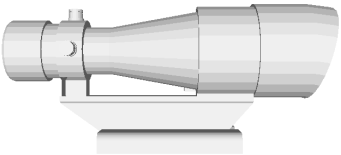   |    |    |
|    |    |    |
|    |    |    |
| Car                                                                                 |                                                                                     |                                                                                       |
|  |  |  |
|  |  |  |
|  |  |  |

Figure 3. Reconstructed surfaces of our network and ONet on ShapeNet testing set.

---

Ground Truth Model

ONet

Ours

---

Sofa

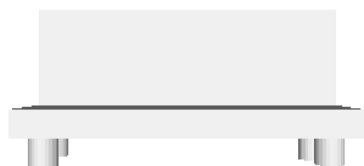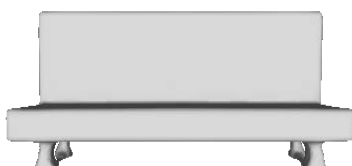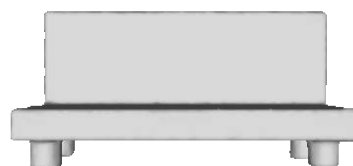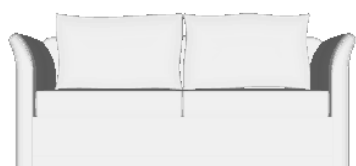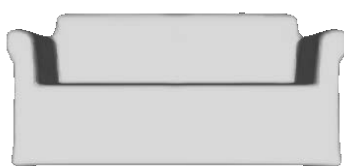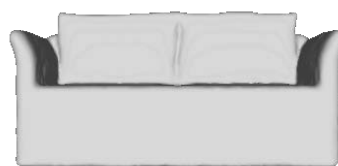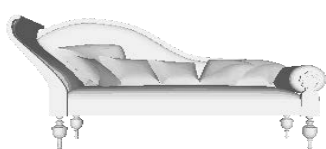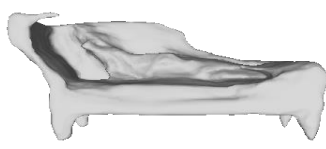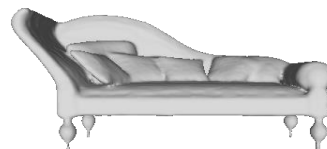

---

Table

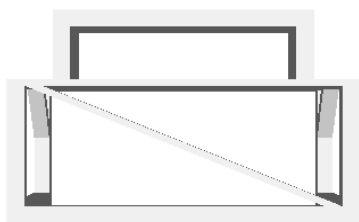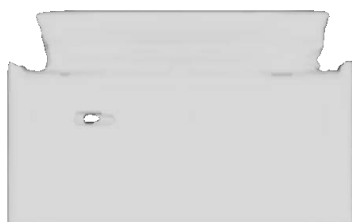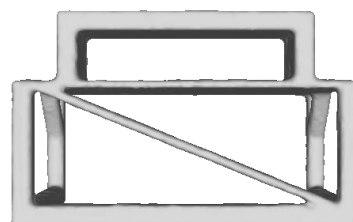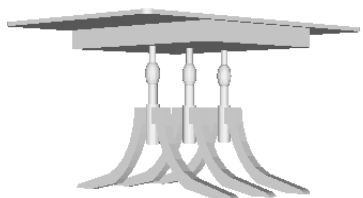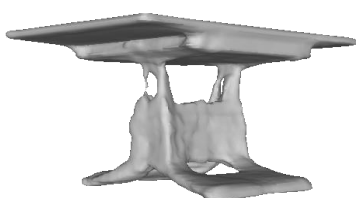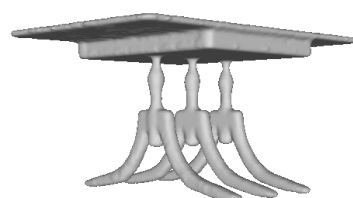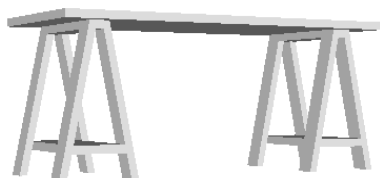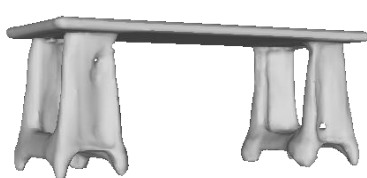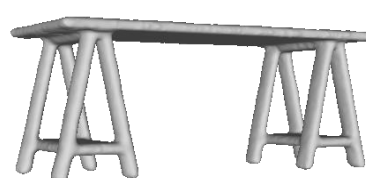

---

Figure 4. Reconstructed surfaces of our network and ONet on ShapeNet testing set.

| Ground Truth Model                                                                  | ONet                                                                                | Ours                                                                                  |
|-------------------------------------------------------------------------------------|-------------------------------------------------------------------------------------|---------------------------------------------------------------------------------------|
| Display                                                                             |                                                                                     |                                                                                       |
| 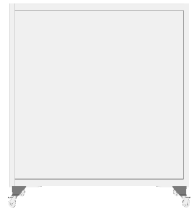   |    |    |
|    |    |    |
|   |   |   |
| Vessel                                                                              |                                                                                     |                                                                                       |
|  |  |  |
|  |  |  |
|  |  |  |

Figure 5. Reconstructed surfaces of our network and ONet on ShapeNet testing set.

| Ground Truth Model                                                                  | ONet                                                                                | Ours                                                                                  |
|-------------------------------------------------------------------------------------|-------------------------------------------------------------------------------------|---------------------------------------------------------------------------------------|
| Telephone                                                                           |                                                                                     |                                                                                       |
|    |    |    |
|    |    |    |
|   |   |   |
| Chair                                                                               |                                                                                     |                                                                                       |
|  |  |  |
|  |  |  |
|  |  |  |

Figure 6. Reconstructed surfaces of our network and ONet on ShapeNet testing set.

| Ground Truth Model                                                                  | ONet                                                                                | Ours                                                                                  |
|-------------------------------------------------------------------------------------|-------------------------------------------------------------------------------------|---------------------------------------------------------------------------------------|
| Cabinet                                                                             |                                                                                     |                                                                                       |
|    |    |    |
|    |    |    |
|   |   |   |
| Loud Speaker                                                                        |                                                                                     |                                                                                       |
|  |  |  |
|  |  |  |
|  |  |  |

Figure 7. Reconstructed surfaces of our network and ONet on ShapeNet testing set.

| Ground Truth Model                                                                  | ONet                                                                                | Ours                                                                                  |
|-------------------------------------------------------------------------------------|-------------------------------------------------------------------------------------|---------------------------------------------------------------------------------------|
| Lamp                                                                                |                                                                                     |                                                                                       |
| 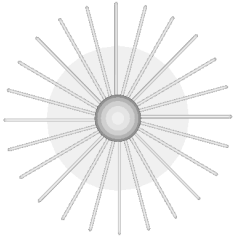   |    |    |
|   |   |   |
|  |  |  |

Figure 8. Reconstructed surfaces of our network and ONet on ShapeNet testing set.

| DTU Points | PSR (trim 8) | PSR (trim 9.5) | Ours |
|------------|--------------|----------------|------|
| stl_010    |              |                |      |
| stl_011    |              |                |      |
| stl_012    |              |                |      |
| stl_013    |              |                |      |
| stl_014    |              |                |      |
| stl_015    |              |                |      |

Figure 9. Reconstructed surfaces of our network and PSR on DTU testing scenes.



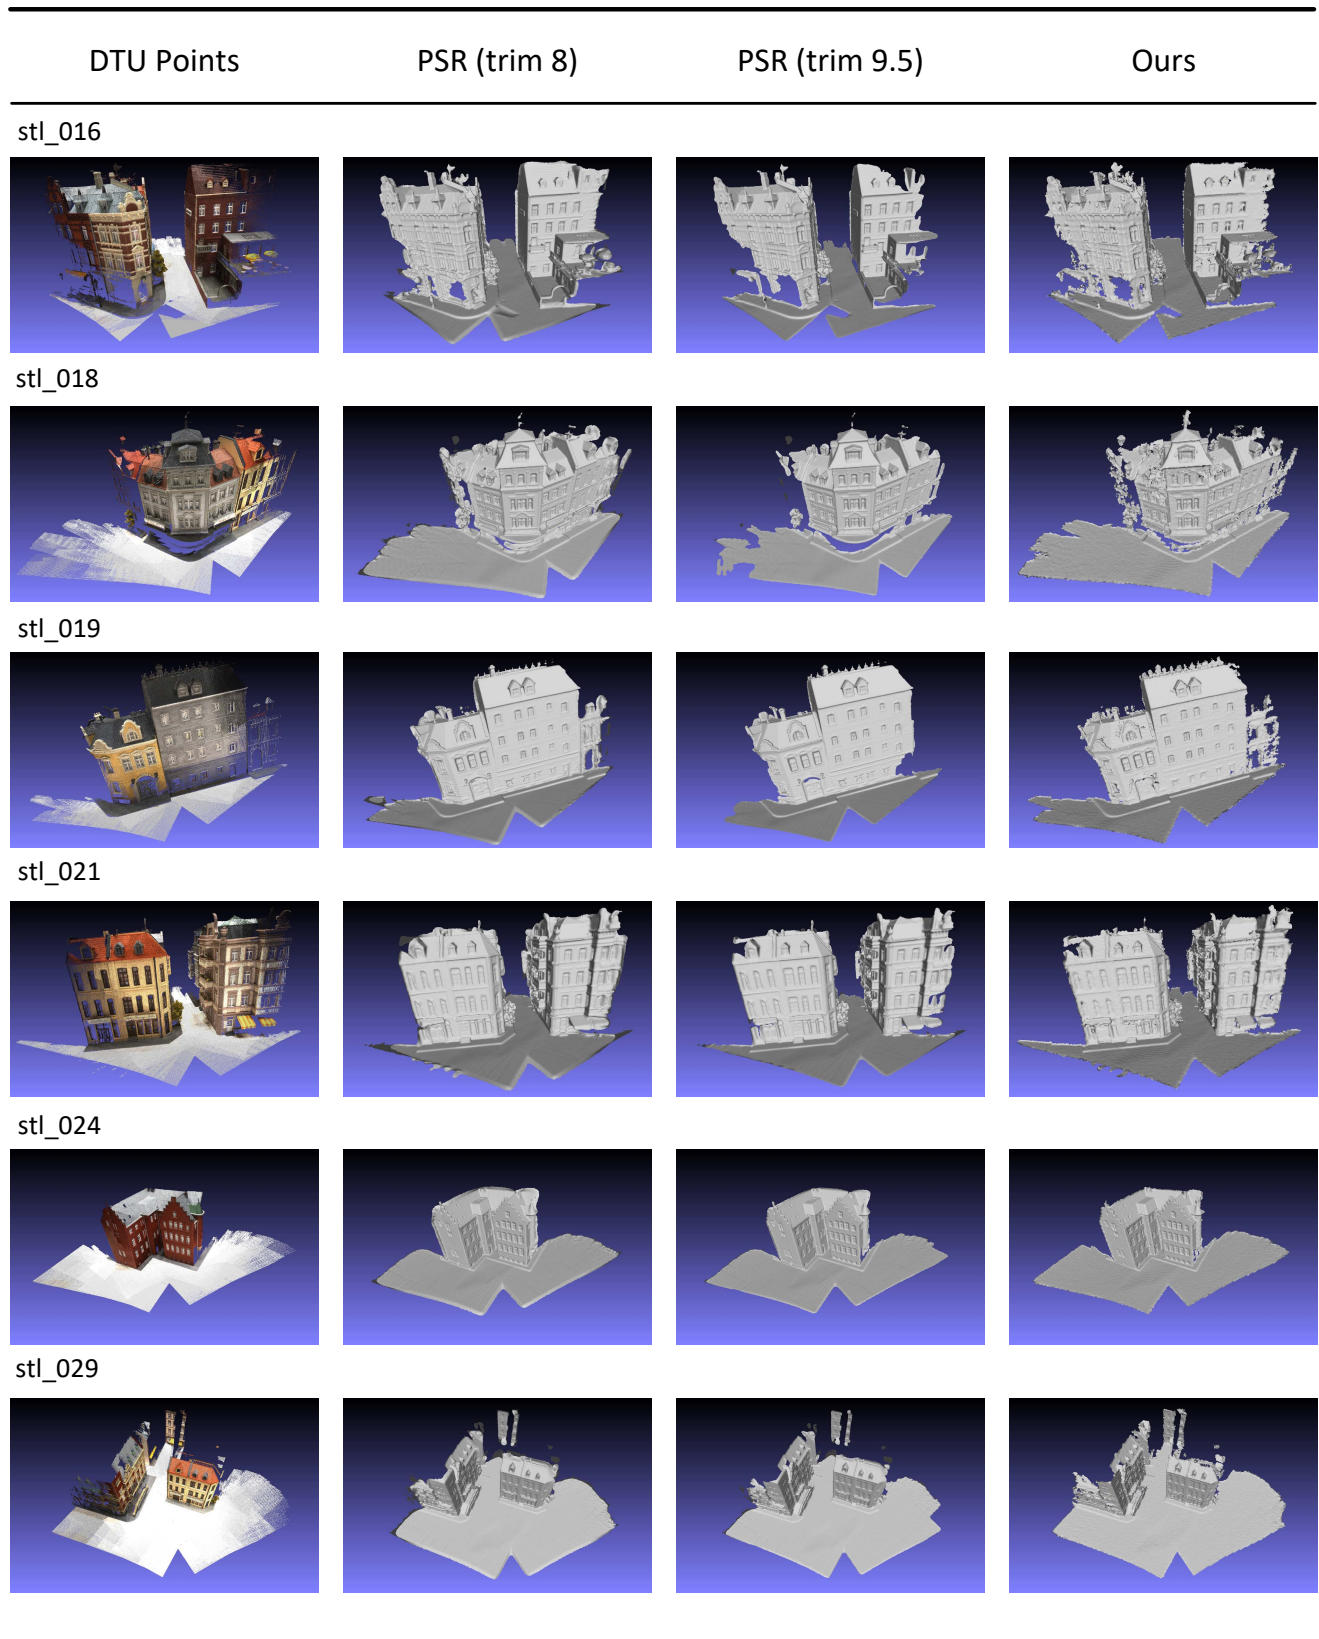

Figure 10. Reconstructed surfaces of our network and PSR on DTU testing scenes.

| DTU Points | PSR (trim 8) | PSR (trim 9.5) | Ours |
|------------|--------------|----------------|------|
| stl_030    |              |                |      |
| stl_034    |              |                |      |
| stl_035    |              |                |      |
| stl_038    |              |                |      |
| stl_041    |              |                |      |
| stl_042    |              |                |      |

Figure 11. Reconstructed surfaces of our network and PSR on DTU testing scenes.

| DTU Points | PSR (trim 8)                                                                        | PSR (trim 9.5)                                                                      | Ours                                                                                 |                                                                                       |
|------------|-------------------------------------------------------------------------------------|-------------------------------------------------------------------------------------|--------------------------------------------------------------------------------------|---------------------------------------------------------------------------------------|
| stl_045    |    |    |    |    |
| stl_046    |    |    |    |    |
| stl_048    |   |   |   |   |
| stl_051    |  |  |  |  |
| stl_055    |  |  |  |  |
| stl_059    |  |  |  |  |

Figure 12. Reconstructed surfaces of our network and PSR on DTU testing scenes.

| DTU Points | PSR (trim 8) | PSR (trim 9.5) | Ours |
|------------|--------------|----------------|------|
| stl_060    |              |                |      |
| stl_061    |              |                |      |
| stl_062    |              |                |      |
| stl_063    |              |                |      |
| stl_065    |              |                |      |
| stl_069    |              |                |      |

Figure 13. Reconstructed surfaces of our network and PSR on DTU testing scenes.



| DTU Points | PSR (trim 8)                                                                        | PSR (trim 9.5)                                                                      | Ours                                                                                 |                                                                                       |
|------------|-------------------------------------------------------------------------------------|-------------------------------------------------------------------------------------|--------------------------------------------------------------------------------------|---------------------------------------------------------------------------------------|
| stl_084    | 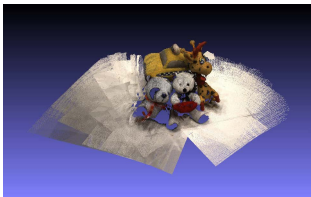   |    |    |    |
| stl_093    |    |    |    |    |
| stl_094    |   |   |   |   |
| stl_095    |  |  |  |  |
| stl_097    |  |  |  |  |
| stl_106    |  |  |  |  |

Figure 14. Reconstructed surfaces of our network and PSR on DTU testing scenes.

| DTU Points | PSR (trim 8) | PSR (trim 9.5) | Ours |
|------------|--------------|----------------|------|
| stl_110    |              |                |      |
| stl_114    |              |                |      |
| stl_122    |              |                |      |
| stl_126    |              |                |      |
| stl_127    |              |                |      |
| stl_128    |              |                |      |

Figure 15. Reconstructed surfaces of our network and PSR on DTU testing scenes.
