# Supplementary material
Source: ML conference proceedings conference paper supplement (https://openaccess.thecvf.com/content/CVPR_2020/html/Mi_SSRNet_Scalable_3D_CVPR_2020_paper.html)
Supplement: Supplementary file 2 [file Mi_SSRNet_Scalable_3D_CVPR_2020_supplemental.zip]

Archive with 2 entries (2 files):
- ssrnet_video.mp4
- ssrnet_pdf.pdf
